# Supplementary material for: Manganese oxide as a water-oxidizing catalyst: from the bulk to Ångström-scale
Source: Royal Society of Chemistry journal article supplement (doi:10.1039/c3nj01393f), 2013-12-06
Supplement: c3nj01393f.pdf [file c3nj01393f.pdf]

# Supporting Information

# Manganese oxide as a water-oxidizing catalyst: From bulk to Ångström-scale

Mohammad Mahdi Najafpour,<sup>a,b\*</sup> Mohsen Abbasi Isaloo,<sup>a</sup> Mahnaz Abasi<sup>a</sup> and Małgorzata Hołyńska<sup>c</sup>

<sup>a</sup>Department of Chemistry, Institute for Advanced Studies in Basic Sciences (IASBS), Zanjan, 45137-66731, Iran.

<sup>b</sup>Center of Climate Change and Global Warming, Institute for Advanced Studies in Basic Sciences (IASBS), Zanjan, 45137-66731, Iran.

<sup>c</sup>Fachbereich Chemie and Wissenschaftliches Zentrum für Materialwissenschaften (WZMW), Philipps-Universität Marburg, Hans-Meerwein-Straße, D-35032 Marburg, Germany.

\*Corresponding Author:

Phone: (+98) 241 415 3201. E-mail: [mmnajafpour@iasbs.ac.ir](mailto:mmnajafpour@iasbs.ac.ir)

## Table of Contents

| <i>Title</i>                                                                     | <i>Page</i>  |
|----------------------------------------------------------------------------------|--------------|
| <i>The CaMn<sub>4</sub>O<sub>5</sub> cluster and the surrounding amino acids</i> | <i>4</i>     |
| <b>Set-up for electrochemical water oxidation</b>                                | <b>5</b>     |
|                                                                                  |              |
| <b>TEM Images</b>                                                                | <b>6-9</b>   |
| <b>BET diagrams</b>                                                              | <b>10-17</b> |
| <b>X-ray diffraction analysis – Complex 1</b>                                    | <b>18-28</b> |
| <b>Proposed mechanisms for the self-healing</b>                                  | <b>29</b>    |
| <b>References</b>                                                                | <b>30</b>    |

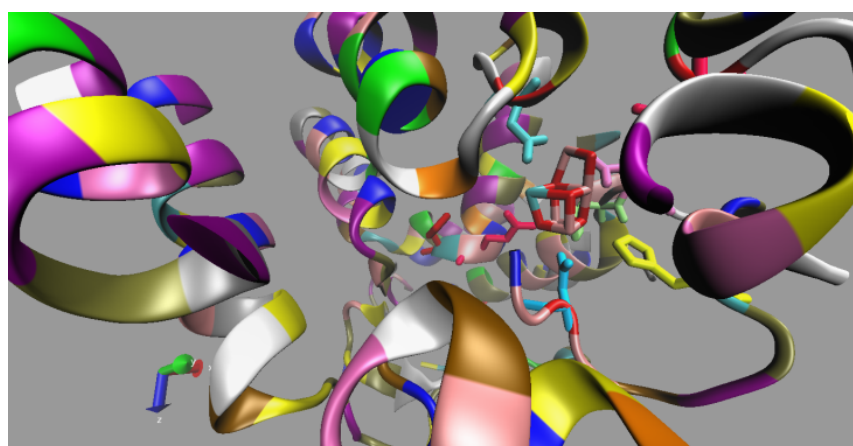

a

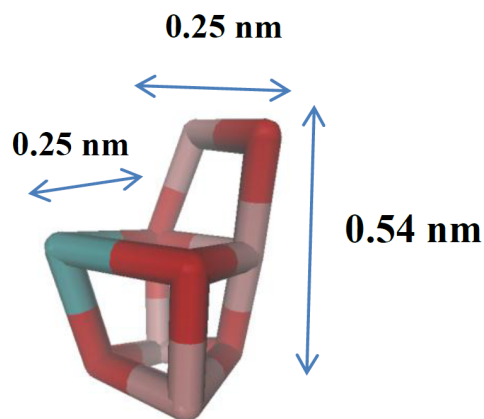

b

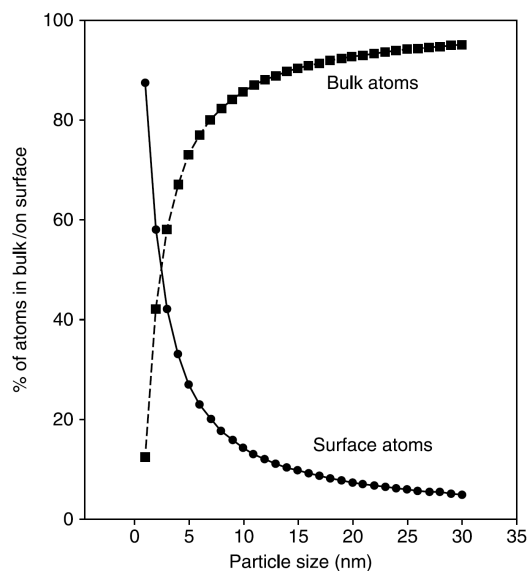

c

Fig. S1 The CaMn<sub>4</sub>O<sub>5</sub> cluster and the surrounding amino acids in PSII (a). The CaMn<sub>4</sub>O<sub>5</sub> cluster in PSII that has dimensions of about  $\sim 0.5 \times 0.25 \times 0.25$  nm<sup>3</sup> (oxygen: red; Mn: pink and calcium: grey) (b). These images were made with VMD software and are owned by the Theoretical and Computational Biophysics Group, NIH Resource for Macromolecular Modeling and Bioinformatics, at the Beckman Institute, University of Illinois at Urbana-Champaign. The original data are taken from from the ref. S1 (PDB: 3ARC). Calculated surface to bulk atomic ratio (c). Image c reprinted with permission from ref. S2 Copyright (1996) by American Chemical Society.

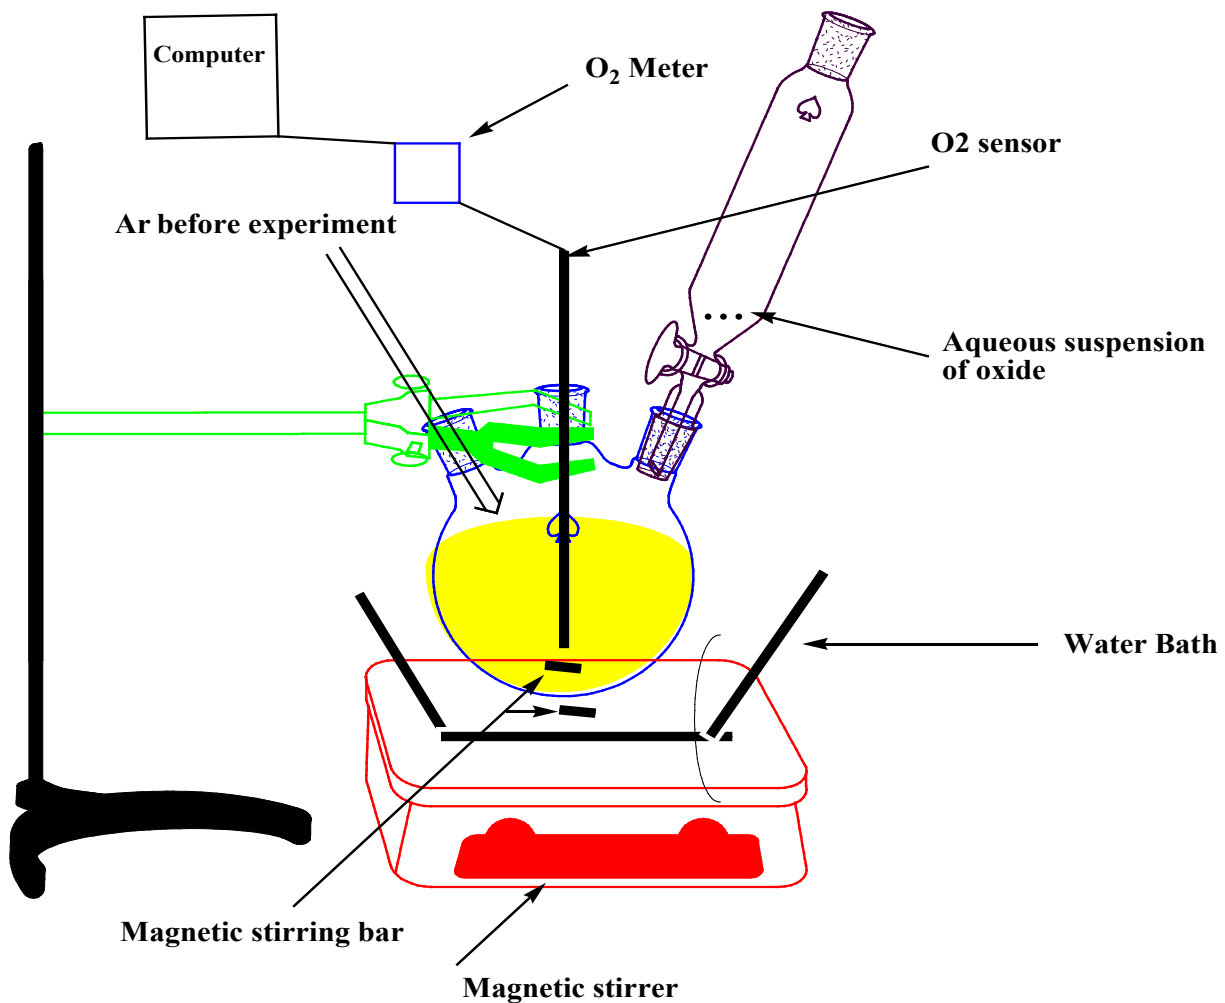

Fig. S2 The reactor set-up for oxygen evolution experiment from aqueous solution in the presence of Ce(IV) and catalysts.

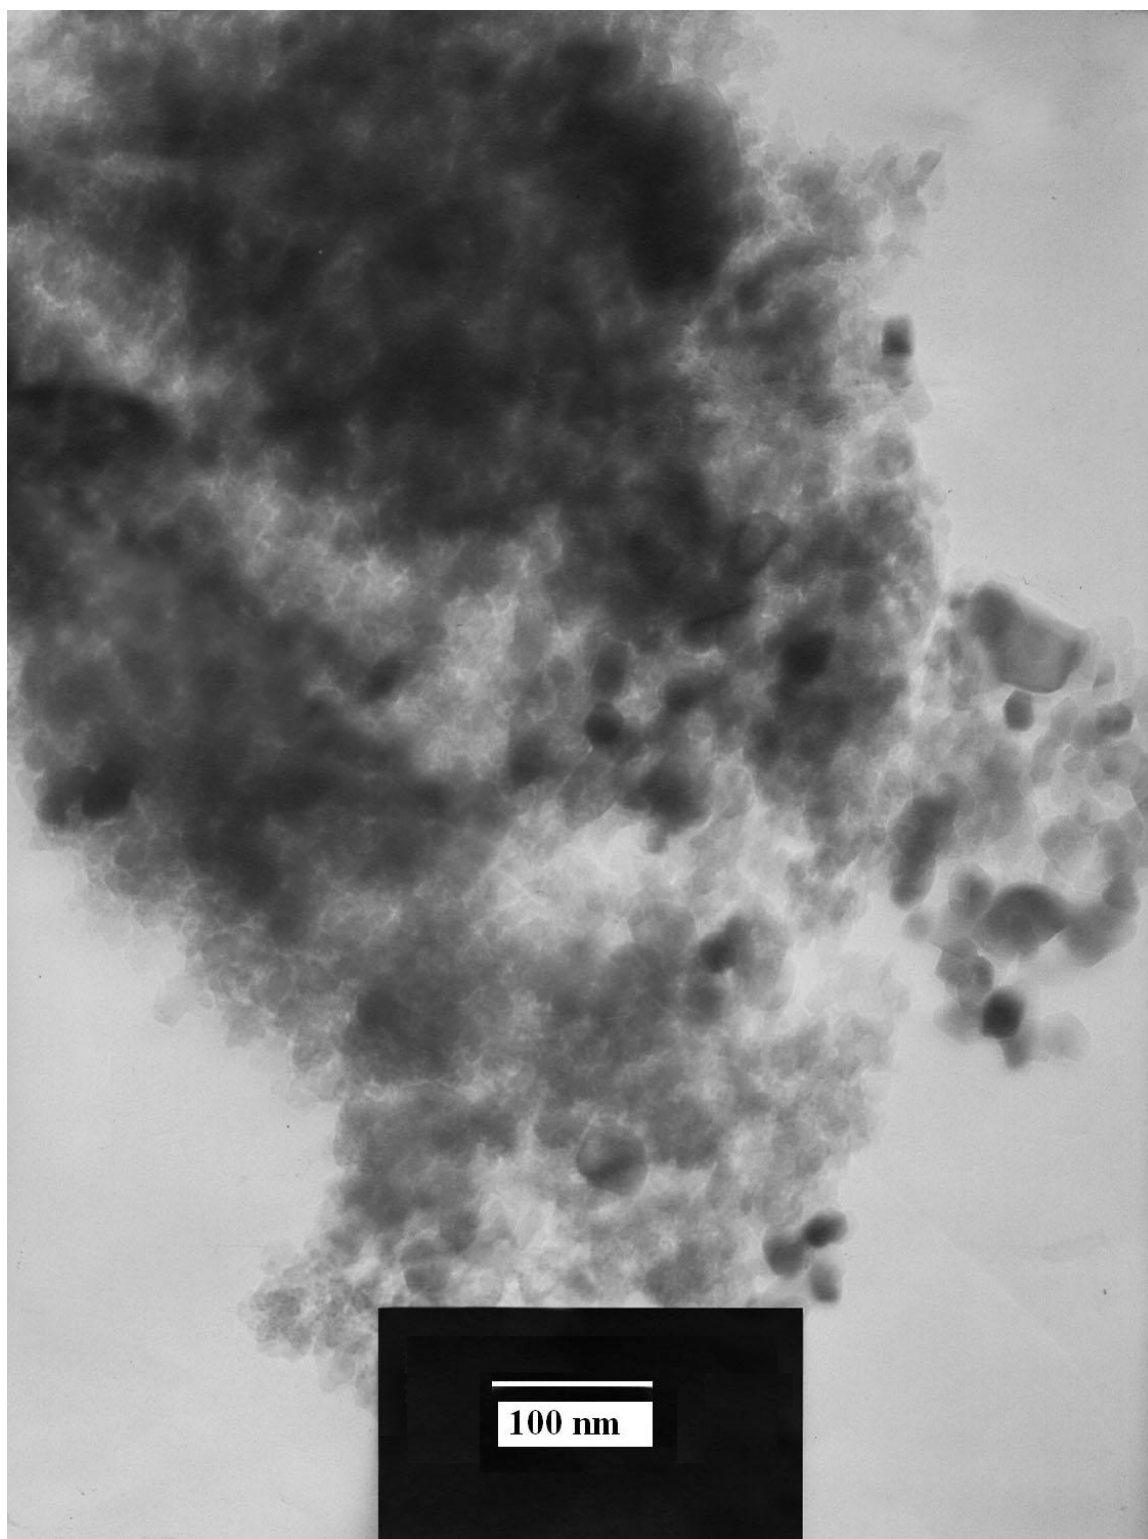

a

6

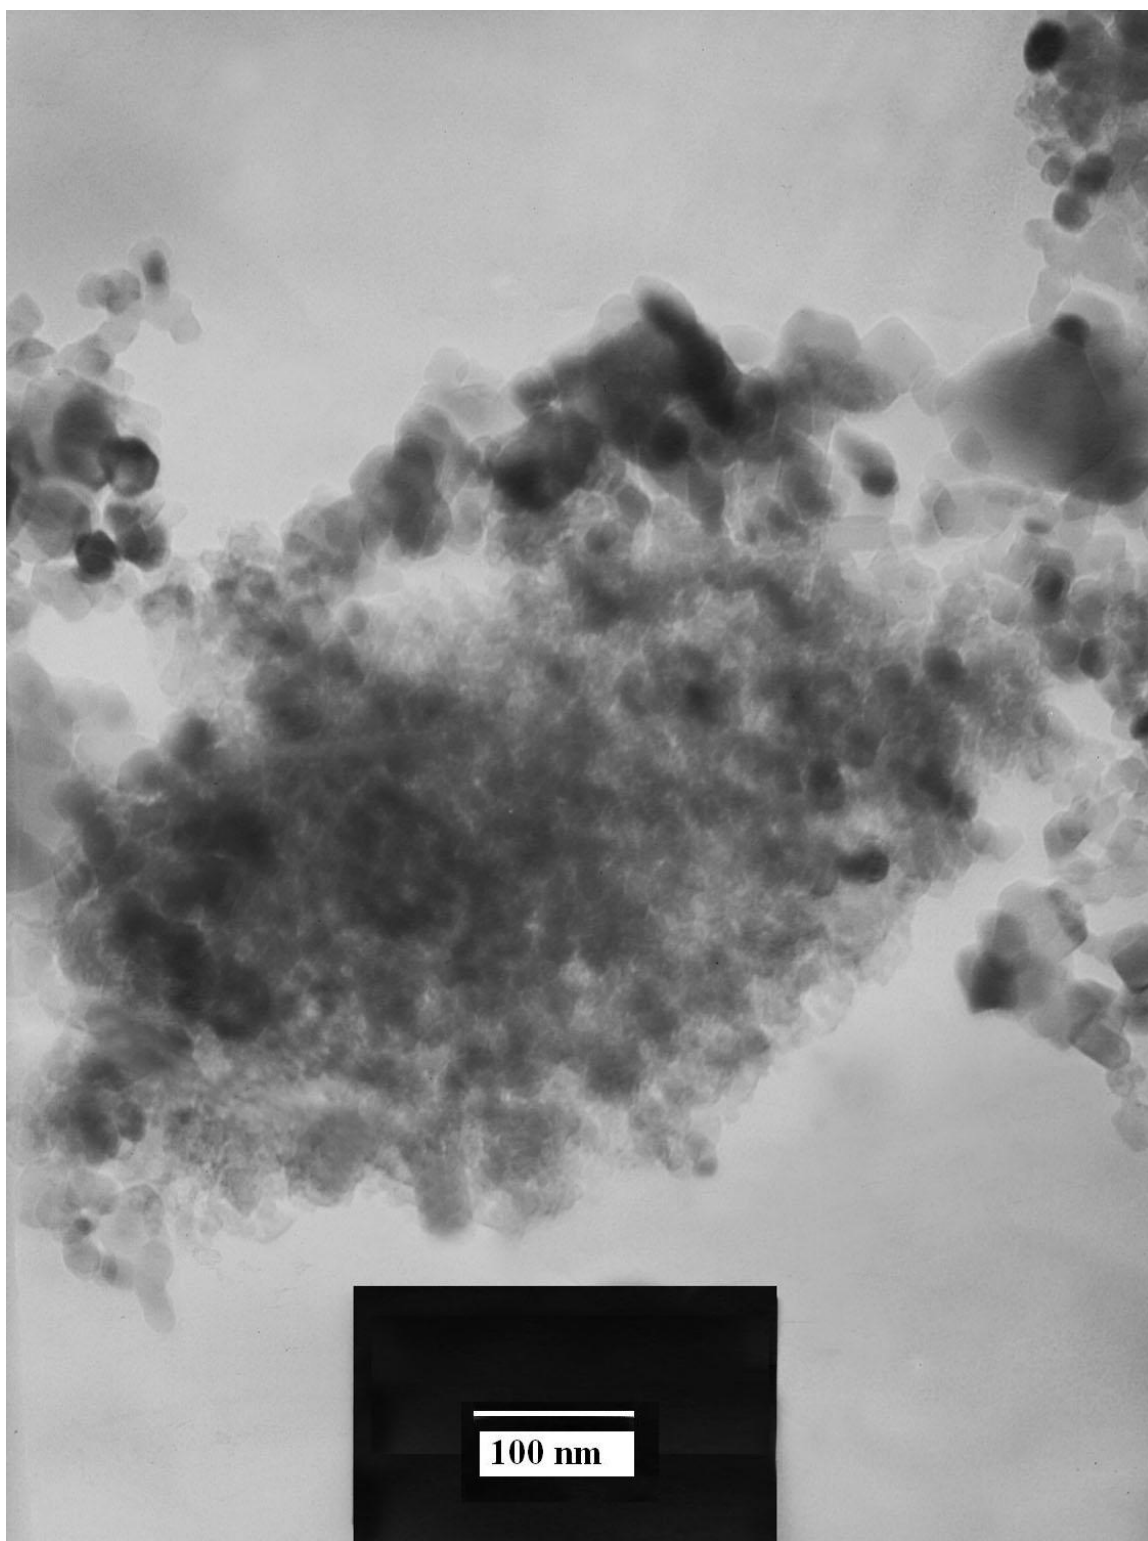

b



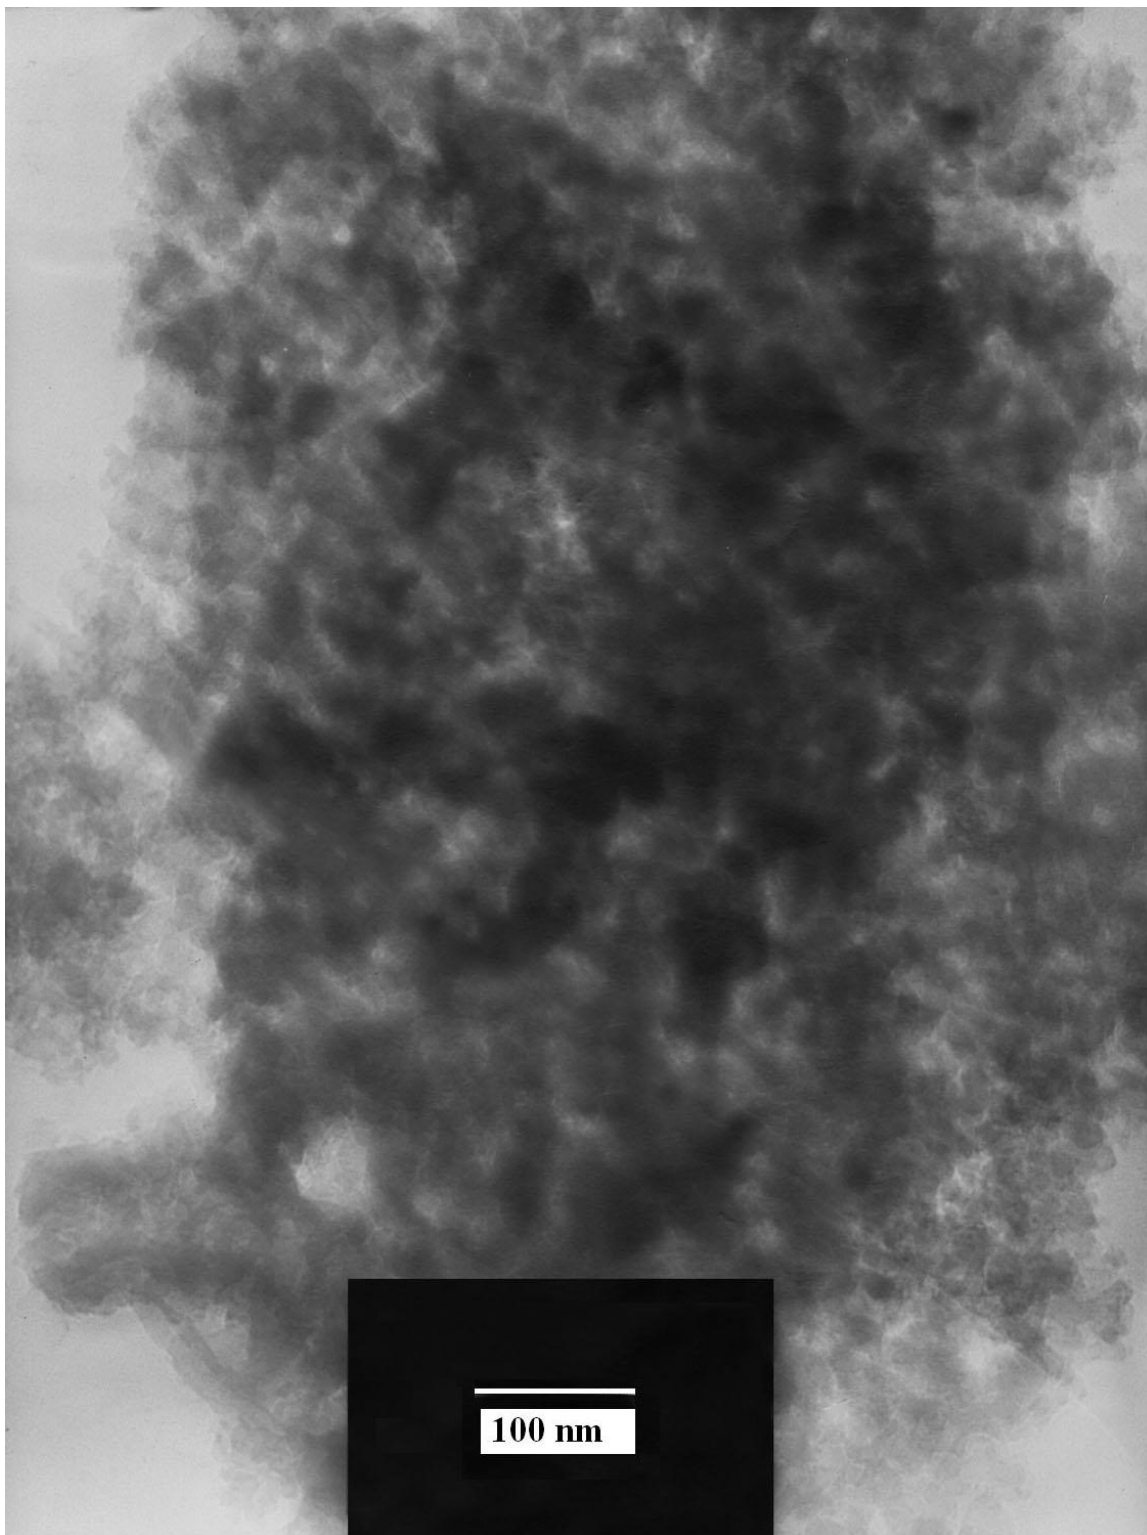

c



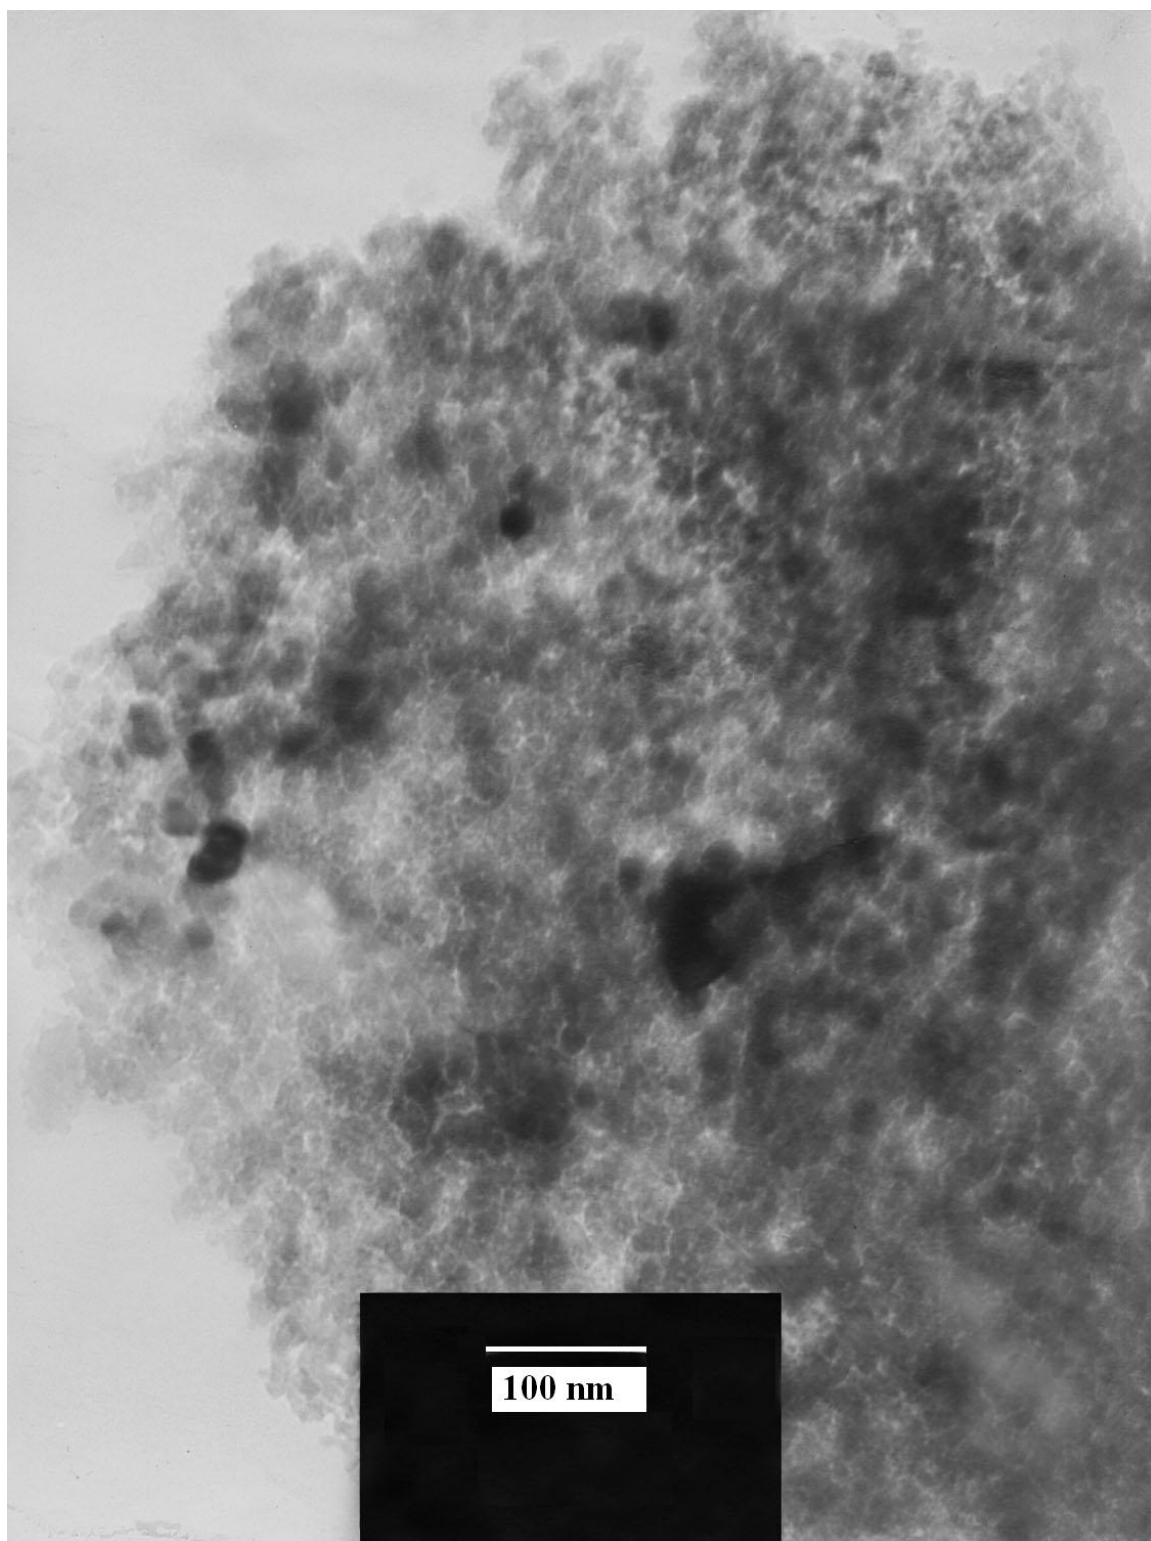

d

Fig. S3 TEM images of manganese oxides within Faujasite zeolite (manganese: 0.15 %) (a-d).

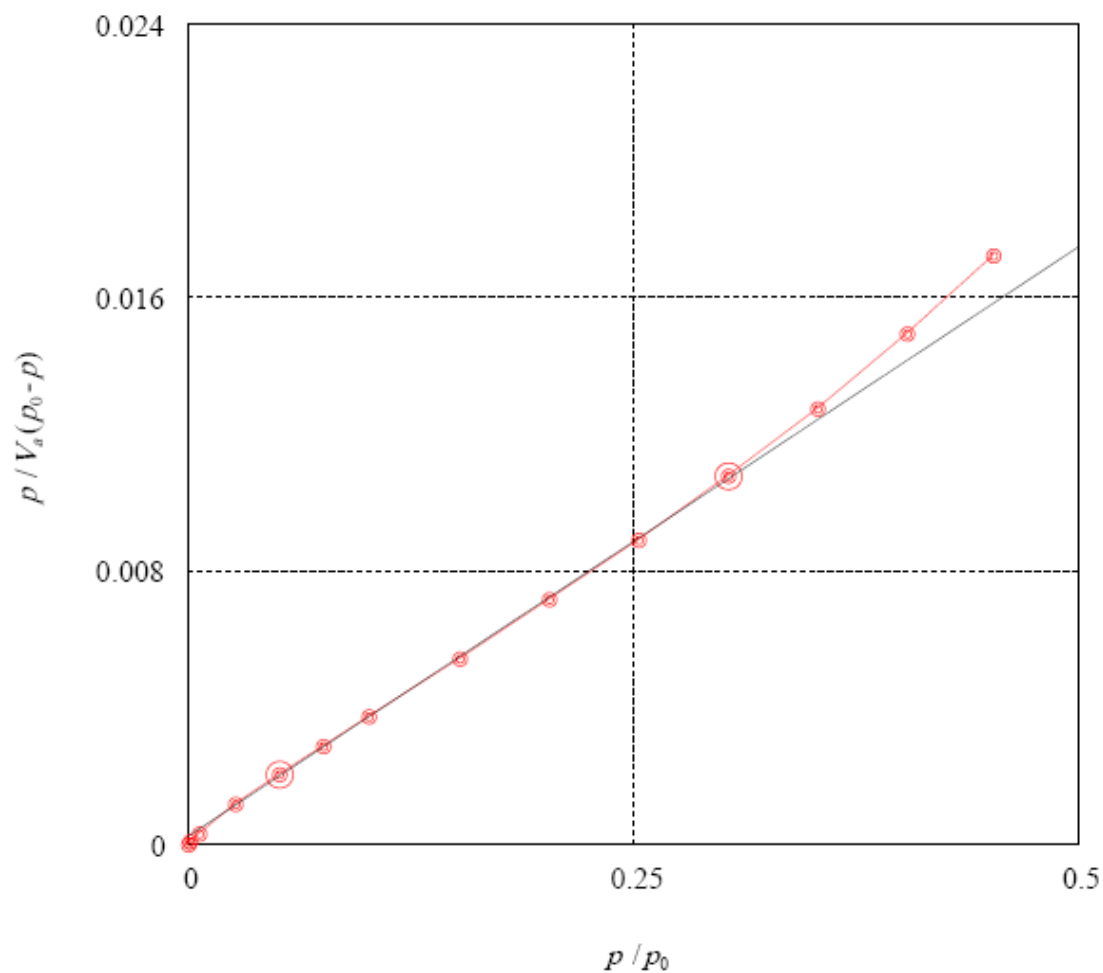

### BET-Plot

Adsorptive N2

Adsorption temperature 77 [K]

○ P1-Zeolite HY.DAT

P1-Zeolite HY  
 Mirzaie  
 pretreatment-4h-100 degree

|                          |            |                                          |                                    |                                              |
|--------------------------|------------|------------------------------------------|------------------------------------|----------------------------------------------|
| Sample weight            | 7.8600E-02 | [g]                                      | Date of measurement                | 13/07/10                                     |
| Saturated vapor pressure | 106.94     | [kPa]                                    | Time of measurement                | 13:42:28                                     |
| $V_m$                    | 28.850     | [cm <sup>3</sup> (STP) g <sup>-1</sup> ] | $a_{s, BET}$                       | 1.2557E+02 [m <sup>2</sup> g <sup>-1</sup> ] |
| $C$                      | 138.11     |                                          | Total pore volume( $p/p_0=0.990$ ) | 0.5144 [cm <sup>3</sup> g <sup>-1</sup> ]    |
| Mean pore diameter       | 16.386     | [nm]                                     |                                    |                                              |

Fig. S4 BET diagram for the HY zeolite.

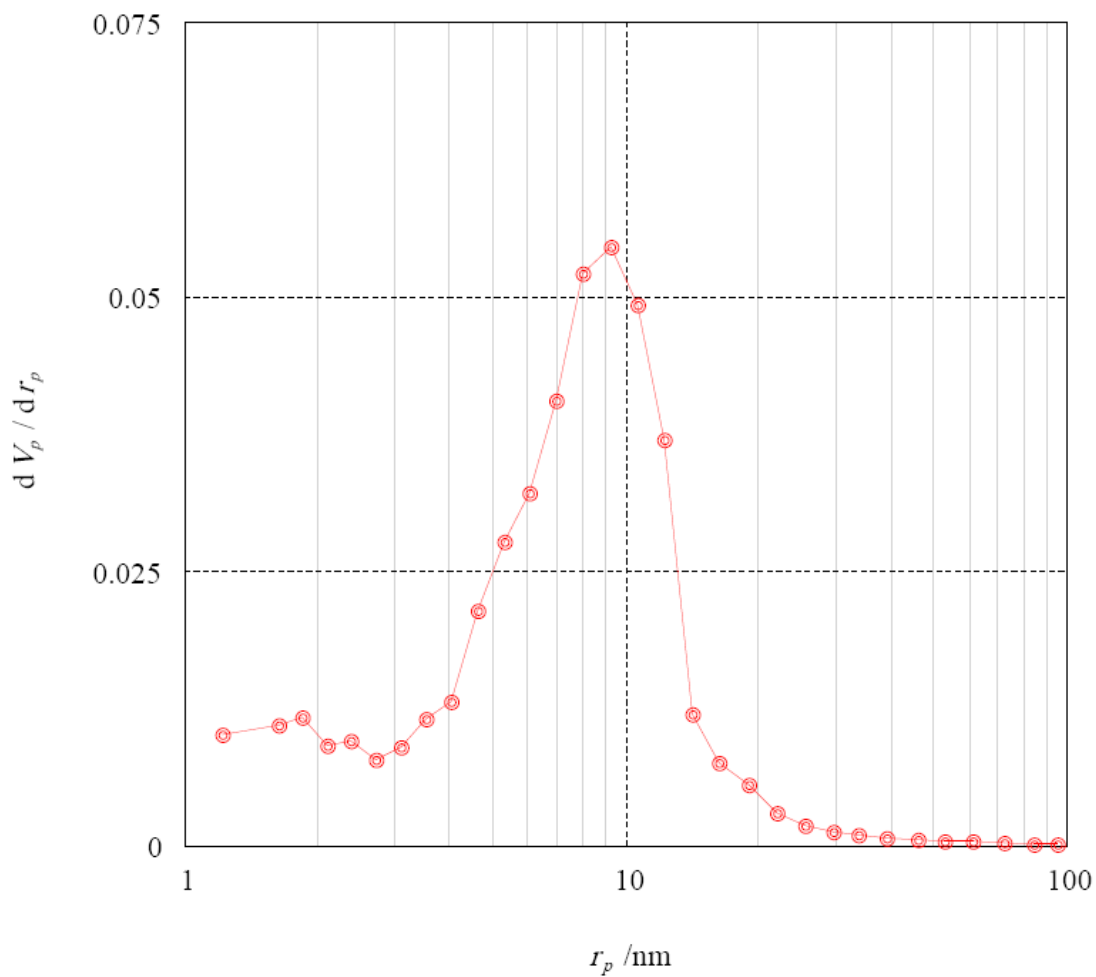

## BJH-Plot

Adsorption branch

Adsorptive N2

Adsorption temperature 77 [K]

○ P1-Zeolite HY.DAT

P1-Zeolite HY

Mirzaie

pretreatment-4h-100 degree

Sample weight 7.8600E-02 [g] Date of measurement 13/07/10

Saturated vapor pressure 106.94 [kPa] Time of measurement 13:42:28

$V_p$  0.5104 [cm<sup>3</sup> g<sup>-1</sup>]  $r_{p,peak}(Area)$  9.23 [nm]

$a_p$  130.56 [m<sup>2</sup> g<sup>-1</sup>]

Fig. S5 BJH diagram for the HY zeolite.

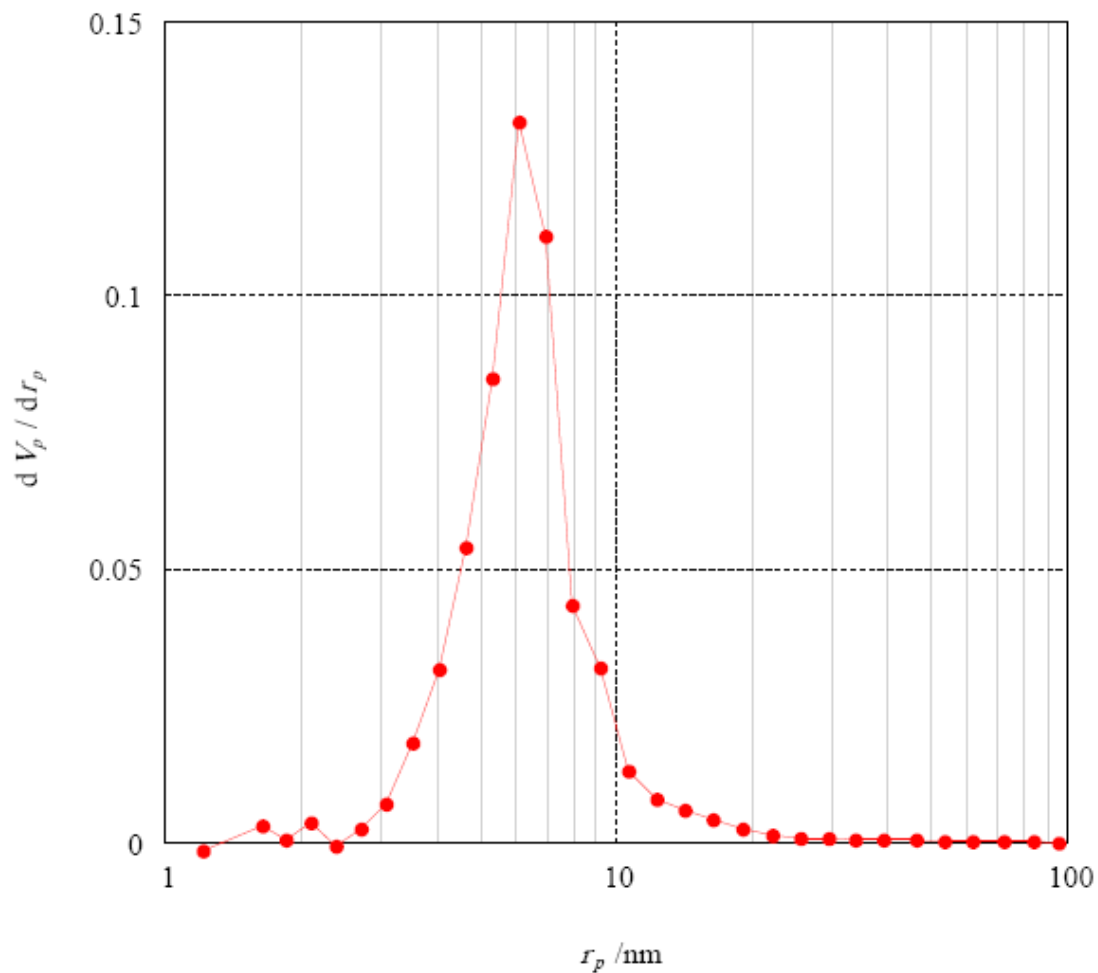

### DH-Plot

Desorption branch

Adsorptive N2

Adsorption temperature 77 [K]

● P1-Zeolite HY.DAT  
 P1-Zeolite HY  
 Mirzaie  
 pretreatment-4h-100 degree

|                          |            |                                    |                     |           |
|--------------------------|------------|------------------------------------|---------------------|-----------|
| Sample weight            | 7.8600E-02 | [g]                                | Date of measurement | 13/07/10  |
| Saturated vapor pressure | 106.94     | [kPa]                              | Time of measurement | 13:42:28  |
| $V_p$                    | 0.5252     | [cm <sup>3</sup> g <sup>-1</sup> ] | $r_{p,peak}(Area)$  | 6.06 [nm] |
| $a_p$                    | 153.11     | [m <sup>2</sup> g <sup>-1</sup> ]  |                     |           |

Fig. S6 DH diagram for the HY zeolite.

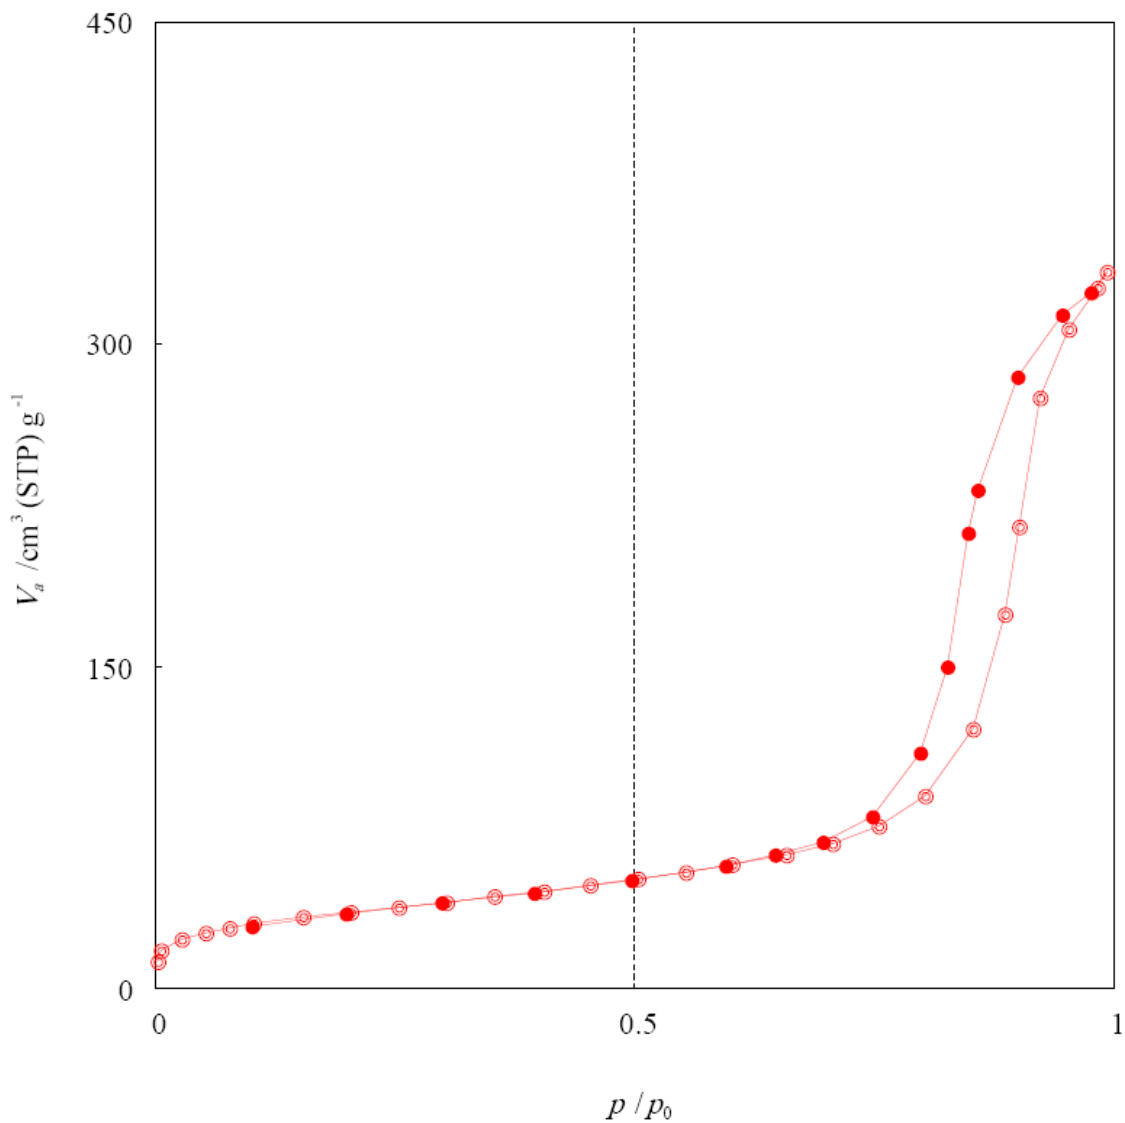

## Adsorption / desorption isotherm

Adsorptive N2

Adsorption temperature 77 [K]

● P1-Zeolite HY.DAT

P1-Zeolite HY  
Mirzaie  
pretreatment-4h-100 degree

|                          |            |       |                     |          |
|--------------------------|------------|-------|---------------------|----------|
| Sample weight            | 7.8600E-02 | [g]   | Date of measurement | 13/07/10 |
| Saturated vapor pressure | 106.94     | [kPa] | Time of measurement | 13:42:28 |

Fig. S7 Adsorption / Desorption Isotherm diagram for the HY Zeolite.

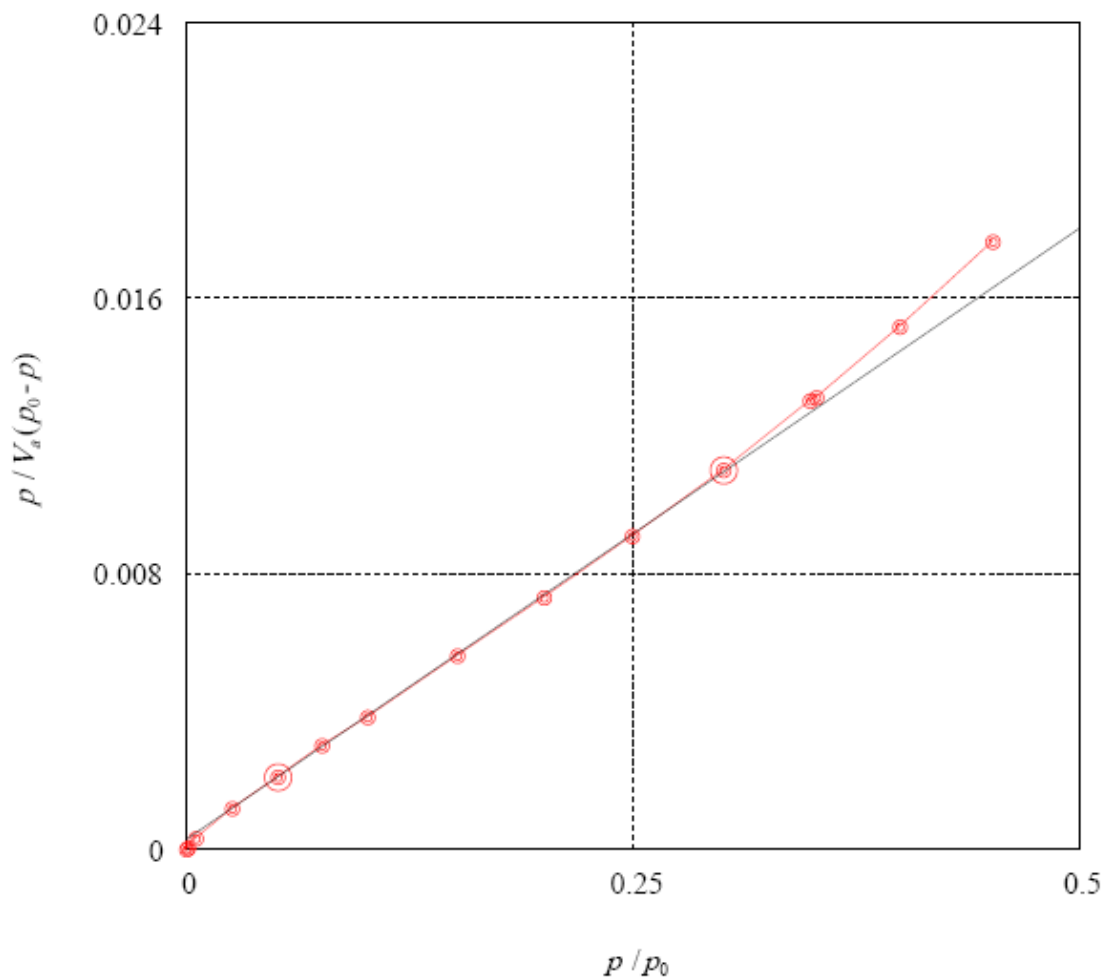

### BET-Plot

Adsorptive N2

Adsorption temperature 77 [K]

○ P1-4-30.DAT

P1-4-30

Mirzaie

pretreatment-4h-100degree

|                          |            |                                          |                                    |                                              |
|--------------------------|------------|------------------------------------------|------------------------------------|----------------------------------------------|
| Sample weight            | 3.2100E-02 | [g]                                      | Date of measurement                | 13/07/10                                     |
| Saturated vapor pressure | 106.72     | [kPa]                                    | Time of measurement                | 11:42:15                                     |
| $V_m$                    | 27.949     | [cm <sup>3</sup> (STP) g <sup>-1</sup> ] | $a_{s,BET}$                        | 1.2165E+02 [m <sup>2</sup> g <sup>-1</sup> ] |
| $C$                      | 134.27     |                                          | Total pore volume( $p/p_0=0.990$ ) | 0.5085 [cm <sup>3</sup> g <sup>-1</sup> ]    |
| Mean pore diameter       | 16.721     | [nm]                                     |                                    |                                              |

Fig. S8 BET diagram for manganese oxide within the HY zeolite with Mn content of 0.4 wt %.

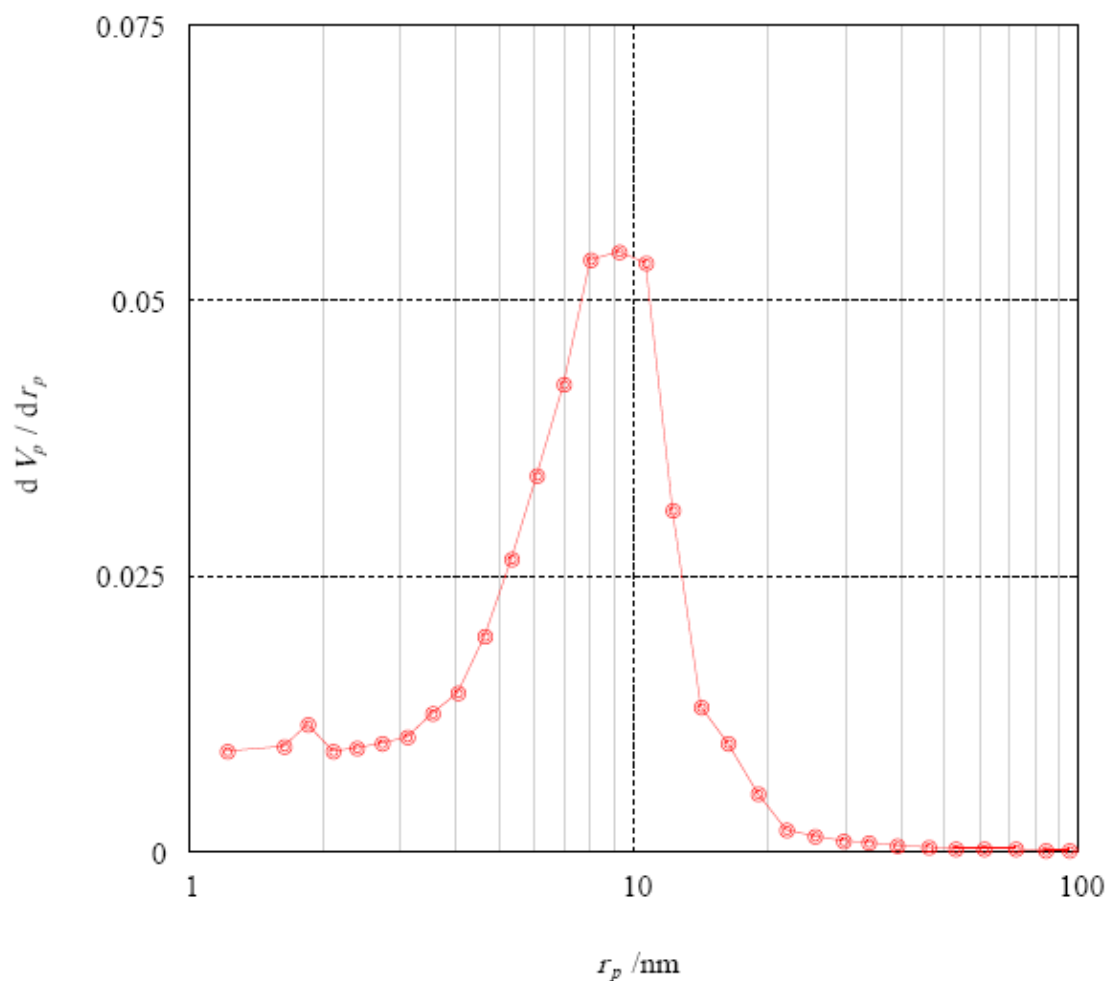

### BJH-Plot

Adsorption branch

Adsorptive N2

Adsorption temperature 77 [K]

○ P1-4-30.DAT  
 P1-4-30  
 Mirzaie  
 pretreatment-4h-100degree

|                          |            |       |                     |          |
|--------------------------|------------|-------|---------------------|----------|
| Sample weight            | 3.2100E-02 | [g]   | Date of measurement | 13/07/10 |
| Saturated vapor pressure | 106.72     | [kPa] | Time of measurement | 11:42:15 |

|       |        |                                    |                    |      |      |
|-------|--------|------------------------------------|--------------------|------|------|
| $V_p$ | 0.5064 | [cm <sup>3</sup> g <sup>-1</sup> ] | $r_{p,peak}(Area)$ | 9.23 | [nm] |
| $a_p$ | 130.81 | [m <sup>2</sup> g <sup>-1</sup> ]  |                    |      |      |

Fig. S9 BJH diagram for manganese oxide within the HY zeolite with Mn content of 0.4 wt %.



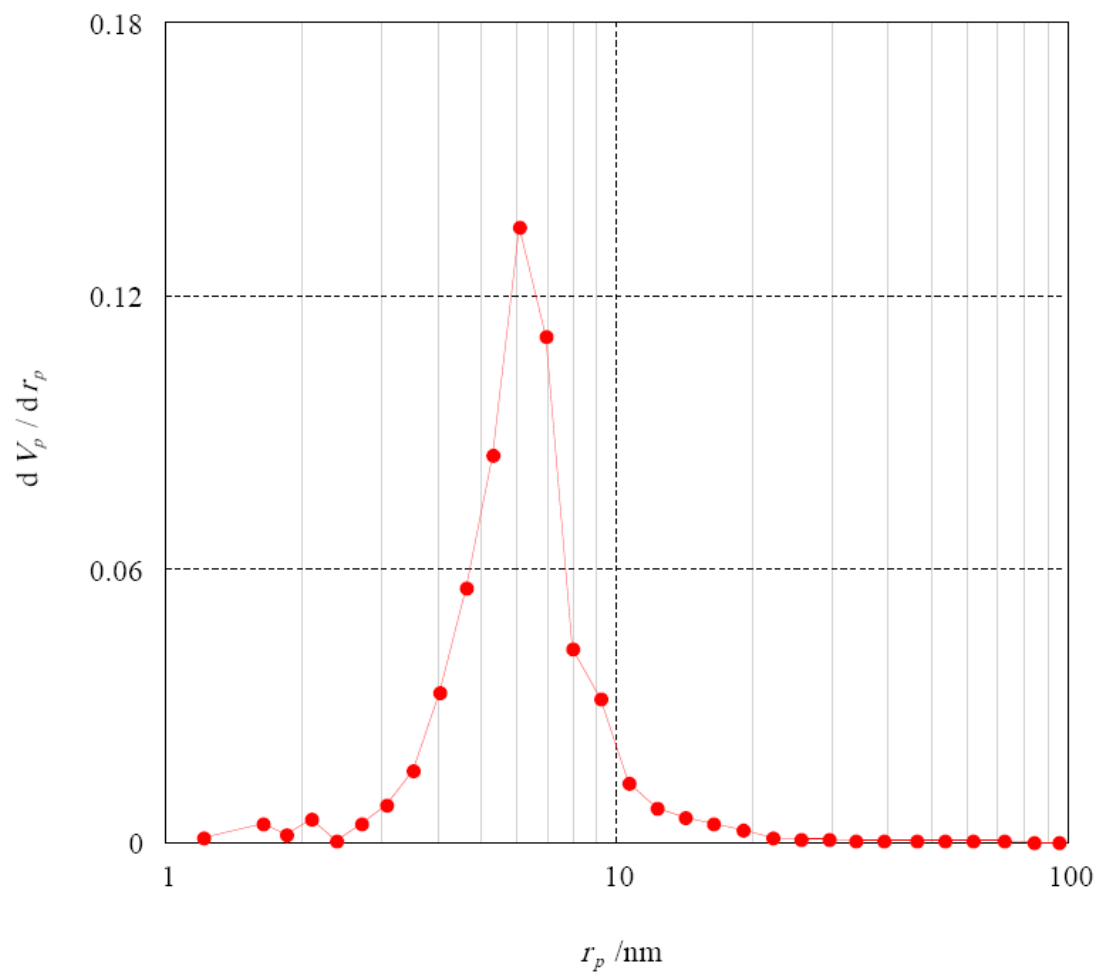

### DH-Plot

Desorption branch

Adsorptive N2

Adsorption temperature 77 [K]

● P1-4-30.DAT

P1-4-30  
 Mirzaie  
 pretreatment-4h-100degree

|                          |            |       |                     |          |
|--------------------------|------------|-------|---------------------|----------|
| Sample weight            | 3.2100E-02 | [g]   | Date of measurement | 13/07/10 |
| Saturated vapor pressure | 106.72     | [kPa] | Time of measurement | 11:42:15 |

|       |        |                                    |                    |      |      |
|-------|--------|------------------------------------|--------------------|------|------|
| $V_p$ | 0.5206 | [cm <sup>3</sup> g <sup>-1</sup> ] | $r_{p,peak}(Area)$ | 6.06 | [nm] |
| $a_p$ | 157.25 | [m <sup>2</sup> g <sup>-1</sup> ]  |                    |      |      |

Fig. S10 DH diagram for manganese oxide within the HY zeolite with Mn content of 0.4 wt %.

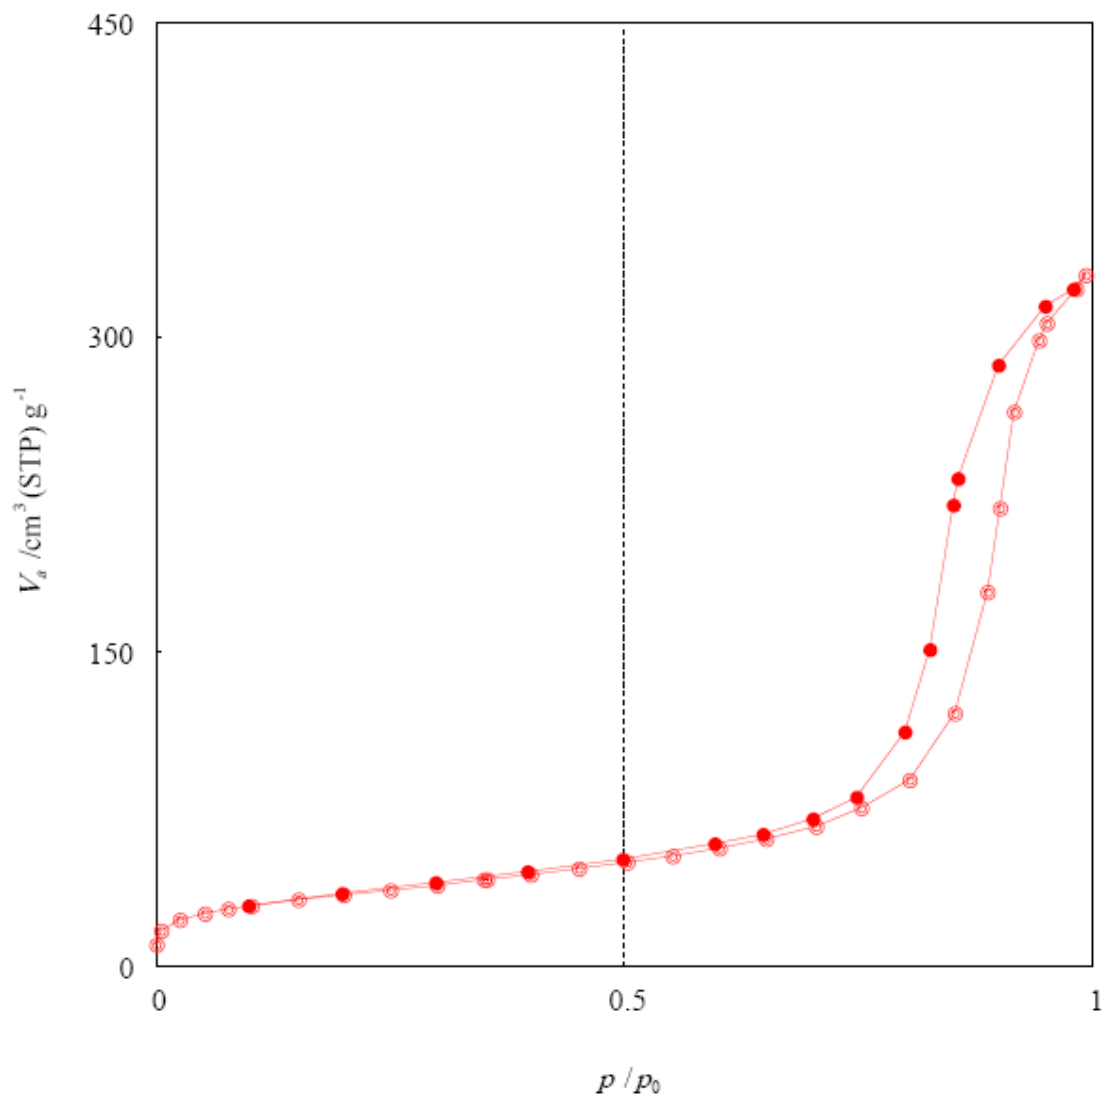

### Adsorption / desorption isotherm

Adsorptive N2

Adsorption temperature 77 [K]

● P1-4-30.DAT

P1-4-30

Mirzaie

pretreatment-4h-100degree

|                          |            |       |                     |          |
|--------------------------|------------|-------|---------------------|----------|
| Sample weight            | 3.2100E-02 | [g]   | Date of measurement | 13/07/10 |
| Saturated vapor pressure | 106.72     | [kPa] | Time of measurement | 11:42:15 |

Fig. S11 Adsorption / Desorption Isotherm diagram for manganese oxide within the HY zeolite with Mn content of 0.4 wt %.

### 3. X-ray diffraction analysis – Complex 1

A monocrystal of complex **1** (see Article) suitable for X-ray diffraction analysis was chosen from a sample displaying twinning problems. Data collection was carried out on a Bruker Quest D8 device with microfocus MoK $\alpha$  radiation and Photon 100 CMOS detector. Main crystallographic data are collected in Table S1.

The structure **1** was solved by direct methods in SHELXS97 and refined by full-matrix method in SHELXL97 [S3]. Three full-occupancy water molecules of solvation were located. For other six water molecules (O4W-O6W, O8W-O10W) the occupancies were refined and subsequently fixed at half-values. O7W-molecule was modeled as disordered in two positions (O7W/O77W components) with occupancies refined to 0.60(3)/0.40(3), respectively. Water ligands bonded to Mn3 were found to be disordered in two positions related by a rotation with respect to an O-Mn-O axis, with occupancies refined to 0.74(2)/0.26(2), respectively. Both H atoms from O1W/O2W and one H atom from O3W water molecule were found on difference Fourier maps, refined with DFIX restraints setting O-H bond lengths at 0.820(2) and H...H distances at 1.50(1) Å, respectively, setting  $U_{eq} = 1.5U_{eq}(\text{parent atom})$ . Subsequently their coordinates were fixed. Positions of the two H atoms from the complex anion were calculated in the expected positions and a riding model was used with  $U_{eq} = 1.2U_{eq}(\text{parent atom})$ . ISOR restraints were used for all water O atoms and for the anion O8, O20 and O29 atoms.

On the final difference Fourier map the highest maximum of 2.67 e/Å<sup>3</sup> is situated at 2.80 Å from W1, 1.32 Å from O9W, 2.44 Å from O6W and 1.70 Å from O4. The maximum could be interpreted as sign of more complicated disorder of the solvent part. However, the distance to the anion terminal O4 atom is too close. O4 is not disordered, the W1-O4 bond length is in the

expected range, therefore the maximum cannot be assigned a plausible interpretation. Presence of such maxima might be connected with drawbacks of the absorption correction.

**Table S1.** Selected X-ray data for **1**.

| <b>1</b>                                            |                                                                                       |
|-----------------------------------------------------|---------------------------------------------------------------------------------------|
| Formula                                             | H <sub>36</sub> Mn <sub>5</sub> O <sub>58</sub> W <sub>12</sub> ·18(H <sub>2</sub> O) |
| Formula weight                                      | 3769.48                                                                               |
| Temperature [K]                                     | 100(2)                                                                                |
| λ [Å]                                               | 0.71073                                                                               |
| Crystal system                                      | Triclinic                                                                             |
| Space group                                         | Pī                                                                                    |
| a [Å]                                               | 11.350 (3)                                                                            |
| b [Å]                                               | 12.153 (3)                                                                            |
| c [Å]                                               | 14.391 (4)                                                                            |
| α [°]                                               | 65.37 (3)                                                                             |
| β [°]                                               | 66.76 (3)                                                                             |
| γ [°]                                               | 80.51 (3)                                                                             |
| V [Å <sup>3</sup> ]                                 | 1658.0 (8)                                                                            |
| Z, ρ <sub>calc</sub> [g cm <sup>-3</sup> ]          | 1, 3.775                                                                              |
| μ [mm <sup>-1</sup> ]                               | 21.76                                                                                 |
| F(000)                                              | 1693                                                                                  |
| Crystal size [mm]                                   | 0.5 × 0.04 × 0.03                                                                     |
| θ range[°]                                          | 2.69-25.00                                                                            |
| rlns: total/unique                                  | 16997/ 5696                                                                           |
| R(int)                                              | 0.046                                                                                 |
| Abs. corr.                                          | numerical                                                                             |
| Min., max.<br>transmission factors                  | 0.196, 0.753                                                                          |
| Data/restraints/params                              | 5696/84/462                                                                           |
| GOF on F <sup>2</sup>                               | 1.02                                                                                  |
| R1 [I > 2σ(I)]                                      | 0.032                                                                                 |
| wR <sub>2</sub> (all data)                          | 0.079                                                                                 |
| Max., min. Δρ <sub>elect</sub> [e Å <sup>-3</sup> ] | 2.67/-1.91                                                                            |

**Table S2.** Selected geometric parameters [ $\text{\AA}$ ,  $^\circ$ ] for **1**. Symmetry codes: (i)  $-x, -y+1, -z+1$ ; (ii)  $-x, -y+2, -z+1$ ; (iii)  $x, y+1, z$ ; (iv)  $-x+1, -y+1, -z$ ; (v)  $x, y-1, z$ .

|                         |           |                        |            |
|-------------------------|-----------|------------------------|------------|
| W1—O5                   | 1.753 (6) | W6—O17                 | 1.740 (6)  |
| W1—O4                   | 1.768 (6) | W6—O18                 | 1.781 (6)  |
| W1—O2                   | 1.874 (6) | W6—O3 <sup>i</sup>     | 1.881 (7)  |
| W1—O3                   | 1.979 (6) | W6—O16                 | 1.916 (6)  |
| W1—O14 <sup>i</sup>     | 2.136 (6) | W6—O13                 | 2.194 (6)  |
| W1—O1                   | 2.181 (6) | W6—O1 <sup>i</sup>     | 2.349 (6)  |
| W2—O9                   | 1.747 (6) | Mn1—O22                | 2.155 (8)  |
| W2—O19 <sup>i</sup>     | 1.795 (6) | Mn1—O5                 | 2.162 (7)  |
| W2—O1                   | 1.885 (6) | Mn1—O26                | 2.162 (8)  |
| W2—O8                   | 1.945 (6) | Mn1—O23                | 2.180 (9)  |
| W2—O6                   | 2.223 (6) | Mn1—O25                | 2.203 (7)  |
| W3—O12                  | 1.725 (6) | Mn1—O24                | 2.224 (7)  |
| W3—O10                  | 1.884 (6) | Mn2—O9                 | 2.142 (7)  |
| W3—O7                   | 1.893 (7) | Mn2—O4 <sup>ii</sup>   | 2.145 (7)  |
| W3—O11                  | 1.929 (6) | Mn2—O29                | 2.158 (7)  |
| W3—O2                   | 1.963 (6) | Mn2—O18 <sup>iii</sup> | 2.176 (6)  |
| W3—O6                   | 2.259 (6) | Mn2—O28                | 2.189 (6)  |
| W4—O15                  | 1.732 (6) | Mn2—O27                | 2.199 (7)  |
| W4—O14                  | 1.814 (6) | Mn3—O20                | 2.151 (6)  |
| W4—O13                  | 1.919 (6) | Mn3—O20 <sup>iv</sup>  | 2.151 (6)  |
| W4—O8                   | 1.967 (6) | Mn3—O30 <sup>iv</sup>  | 2.164 (9)  |
| W4—O10                  | 2.068 (6) | Mn3—O30                | 2.164 (9)  |
| W4—O6                   | 2.241 (7) | Mn3—O31A <sup>iv</sup> | 2.184 (15) |
| W5—O21                  | 1.732 (7) | Mn3—O31A               | 2.184 (15) |
| W5—O20                  | 1.743 (6) | Mn3—O30A <sup>iv</sup> | 2.185 (16) |
| W5—O11                  | 1.891 (6) | Mn3—O30A               | 2.185 (16) |
| W5—O16                  | 1.949 (6) | Mn3—O31                | 2.199 (8)  |
| W5—O19                  | 2.203 (6) | Mn3—O31 <sup>iv</sup>  | 2.199 (8)  |
| W5—O13                  | 2.262 (6) |                        |            |
| O5—W1—O4                | 102.4 (3) | O16—W6—O1 <sup>i</sup> | 84.4 (2)   |
| O5—W1—O2                | 100.3 (3) | O13—W6—O1 <sup>i</sup> | 77.4 (2)   |
| O4—W1—O2                | 99.6 (3)  | O22—Mn1—O5             | 96.9 (3)   |
| O5—W1—O3                | 94.9 (3)  | O22—Mn1—O26            | 91.9 (3)   |
| O4—W1—O3                | 91.7 (3)  | O5—Mn1—O26             | 89.4 (3)   |
| O2—W1—O3                | 158.6 (3) | O22—Mn1—O23            | 88.3 (4)   |
| O5—W1—O14 <sup>i</sup>  | 89.9 (3)  | O5—Mn1—O23             | 174.0 (4)  |
| O4—W1—O14 <sup>i</sup>  | 164.9 (3) | O26—Mn1—O23            | 93.4 (4)   |
| O2—W1—O14 <sup>i</sup>  | 86.4 (2)  | O22—Mn1—O25            | 92.0 (3)   |
| O3—W1—O14 <sup>i</sup>  | 78.5 (2)  | O5—Mn1—O25             | 86.3 (3)   |
| O5—W1—O1                | 164.5 (2) | O26—Mn1—O25            | 174.5 (3)  |
| O4—W1—O1                | 89.9 (3)  | O23—Mn1—O25            | 90.6 (4)   |
| O2—W1—O1                | 86.7 (3)  | O22—Mn1—O24            | 169.0 (3)  |
| O3—W1—O1                | 75.1 (2)  | O5—Mn1—O24             | 93.9 (3)   |
| O14 <sup>i</sup> —W1—O1 | 76.6 (2)  | O26—Mn1—O24            | 90.5 (3)   |
| O9—W2—O19 <sup>i</sup>  | 103.7 (3) | O23—Mn1—O24            | 80.9 (3)   |

|                         |           |                                            |             |
|-------------------------|-----------|--------------------------------------------|-------------|
| O9—W2—O1                | 102.1 (3) | O25—Mn1—O24                                | 86.4 (3)    |
| O19 <sup>i</sup> —W2—O1 | 96.1 (3)  | O9—Mn2—O4 <sup>ii</sup>                    | 172.3 (3)   |
| O9—W2—O8                | 97.8 (3)  | O9—Mn2—O29                                 | 91.8 (3)    |
| O19 <sup>i</sup> —W2—O8 | 92.8 (3)  | O4 <sup>ii</sup> —Mn2—O29                  | 92.0 (2)    |
| O1—W2—O8                | 155.6 (3) | O9—Mn2—O18 <sup>iii</sup>                  | 85.9 (2)    |
| O9—W2—O6                | 163.7 (3) | O4 <sup>ii</sup> —Mn2—O18 <sup>iii</sup>   | 91.3 (2)    |
| O19 <sup>i</sup> —W2—O6 | 89.8 (3)  | O29—Mn2—O18 <sup>iii</sup>                 | 171.7 (3)   |
| O1—W2—O6                | 85.3 (3)  | O9—Mn2—O28                                 | 88.5 (2)    |
| O8—W2—O6                | 72.0 (2)  | O4 <sup>ii</sup> —Mn2—O28                  | 84.9 (2)    |
| O12—W3—O10              | 101.4 (3) | O29—Mn2—O28                                | 86.8 (3)    |
| O12—W3—O7               | 101.8 (3) | O18 <sup>iii</sup> —Mn2—O28                | 101.1 (3)   |
| O10—W3—O7               | 91.7 (3)  | O9—Mn2—O27                                 | 93.9 (3)    |
| O12—W3—O11              | 102.2 (3) | O4 <sup>ii</sup> —Mn2—O27                  | 93.1 (3)    |
| O10—W3—O11              | 88.0 (3)  | O29—Mn2—O27                                | 86.1 (3)    |
| O1—W2—O8                | 155.6 (3) | O9—Mn2—O18 <sup>iii</sup>                  | 85.9 (2)    |
| O9—W2—O6                | 163.7 (3) | O4 <sup>ii</sup> —Mn2—O18 <sup>iii</sup>   | 91.3 (2)    |
| O19 <sup>i</sup> —W2—O6 | 89.8 (3)  | O29—Mn2—O18 <sup>iii</sup>                 | 171.7 (3)   |
| O1—W2—O6                | 85.3 (3)  | O9—Mn2—O28                                 | 88.5 (2)    |
| O8—W2—O6                | 72.0 (2)  | O4 <sup>ii</sup> —Mn2—O28                  | 84.9 (2)    |
| O12—W3—O10              | 101.4 (3) | O29—Mn2—O28                                | 86.8 (3)    |
| O12—W3—O7               | 101.8 (3) | O18 <sup>iii</sup> —Mn2—O28                | 101.1 (3)   |
| O10—W3—O7               | 91.7 (3)  | O9—Mn2—O27                                 | 93.9 (3)    |
| O12—W3—O11              | 102.2 (3) | O4 <sup>ii</sup> —Mn2—O27                  | 93.1 (3)    |
| O10—W3—O11              | 88.0 (3)  | O29—Mn2—O27                                | 86.1 (3)    |
| O7—W3—O11               | 155.5 (3) | O18 <sup>iii</sup> —Mn2—O27                | 86.1 (3)    |
| O12—W3—O2               | 102.6 (3) | O28—Mn2—O27                                | 172.6 (3)   |
| O10—W3—O2               | 155.8 (3) | O20—Mn3—O20 <sup>iv</sup>                  | 180.0       |
| O7—W3—O2                | 86.7 (3)  | O20—Mn3—O30 <sup>iv</sup>                  | 93.1 (3)    |
| O11—W3—O2               | 83.6 (3)  | O20 <sup>iv</sup> —Mn3—O30 <sup>iv</sup>   | 86.9 (3)    |
| O12—W3—O6               | 176.4 (3) | O20—Mn3—O30                                | 86.9 (3)    |
| O10—W3—O6               | 75.9 (2)  | O20 <sup>iv</sup> —Mn3—O30                 | 93.1 (3)    |
| O7—W3—O6                | 76.0 (2)  | O30 <sup>iv</sup> —Mn3—O30                 | 179.999 (1) |
| O11—W3—O6               | 80.2 (2)  | O20—Mn3—O31A <sup>iv</sup>                 | 86.8 (7)    |
| O2—W3—O6                | 80.3 (3)  | O20 <sup>iv</sup> —Mn3—O31A <sup>iv</sup>  | 93.2 (7)    |
| O15—W4—O14              | 103.4 (3) | O20—Mn3—O31A                               | 93.2 (7)    |
| O15—W4—O13              | 103.2 (3) | O20 <sup>iv</sup> —Mn3—O31A                | 86.8 (7)    |
| O14—W4—O13              | 94.2 (3)  | O31A <sup>iv</sup> —Mn3—O31A               | 179.999 (1) |
| O15—W4—O8               | 97.4 (3)  | O20—Mn3—O30A <sup>iv</sup>                 | 89.8 (8)    |
| O14—W4—O8               | 92.3 (3)  | O20 <sup>iv</sup> —Mn3—O30A <sup>iv</sup>  | 90.2 (8)    |
| O13—W4—O8               | 156.2 (3) | O31A <sup>iv</sup> —Mn3—O30A <sup>iv</sup> | 92.0 (11)   |
| O15—W4—O10              | 96.5 (3)  | O31A—Mn3—O30A <sup>iv</sup>                | 88.0 (11)   |
| O14—W4—O10              | 160.0 (3) | O20—Mn3—O30A                               | 90.2 (8)    |
| O13—W4—O10              | 83.6 (2)  | O20 <sup>iv</sup> —Mn3—O30A                | 89.8 (8)    |
| O8—W4—O10               | 82.6 (2)  | O31A <sup>iv</sup> —Mn3—O30A               | 88.0 (11)   |
| O15—W4—O6               | 165.1 (3) | O31A—Mn3—O30A                              | 92.0 (11)   |
| O14—W4—O6               | 87.1 (3)  | O30A <sup>iv</sup> —Mn3—O30A               | 179.999 (2) |
| O13—W4—O6               | 86.3 (2)  | O20—Mn3—O31                                | 89.2 (3)    |
| O8—W4—O6                | 71.2 (2)  | O20 <sup>iv</sup> —Mn3—O31                 | 90.8 (3)    |
| O10—W4—O6               | 72.9 (2)  | O30 <sup>iv</sup> —Mn3—O31                 | 89.7 (4)    |
| O21—W5—O20              | 102.5 (3) | O30—Mn3—O31                                | 90.3 (4)    |
| O21—W5—O11              | 100.6 (3) | O20—Mn3—O31 <sup>iv</sup>                  | 90.8 (3)    |
| O20—W5—O11              | 97.9 (3)  | O20 <sup>iv</sup> —Mn3—O31 <sup>iv</sup>   | 89.2 (3)    |
| O21—W5—O16              | 96.4 (3)  | O30 <sup>iv</sup> —Mn3—O31 <sup>iv</sup>   | 90.3 (4)    |

|                                     |           |                           |             |
|-------------------------------------|-----------|---------------------------|-------------|
| O20—W5—O16                          | 95.6 (3)  | O30—Mn3—O31 <sup>iv</sup> | 89.7 (4)    |
| O11—W5—O16                          | 155.3 (3) | O31—Mn3—O31 <sup>iv</sup> | 179.999 (1) |
| O21—W5—O19                          | 87.4 (3)  | W2—O1—W1                  | 140.8 (3)   |
| O20—W5—O19                          | 169.5 (3) | W2—O1—W6 <sup>i</sup>     | 124.2 (3)   |
| O11—W5—O19                          | 83.7 (2)  | W1—O1—W6 <sup>i</sup>     | 93.3 (2)    |
| O16—W5—O19                          | 79.4 (2)  | W1—O2—W3                  | 148.4 (4)   |
| O21—W5—O13                          | 161.7 (3) | W6 <sup>i</sup> —O3—W1    | 117.2 (3)   |
| O20—W5—O13                          | 93.1 (3)  | W1—O4—Mn2 <sup>ii</sup>   | 137.8 (4)   |
| O11—W5—O13                          | 86.4 (3)  | W1—O5—Mn1                 | 137.5 (3)   |
| O16—W5—O13                          | 72.4 (2)  | W2—O6—W4                  | 97.2 (3)    |
| O19—W5—O13                          | 76.6 (2)  | W2—O6—W3                  | 97.0 (2)    |
| O17—W6—O18                          | 102.6 (3) | W4—O6—W3                  | 95.9 (2)    |
| O17—W6—O3 <sup>i</sup>              | 99.9 (3)  | W2—O8—W4                  | 117.8 (3)   |
| O18—W6—O3 <sup>i</sup>              | 98.6 (3)  | W2—O9—Mn2                 | 169.8 (4)   |
| O17—W6—O16                          | 100.7 (3) | W3—O10—W4                 | 115.3 (3)   |
| O18—W6—O16                          | 95.3 (3)  | W5—O11—W3                 | 149.2 (4)   |
| O3 <sup>i</sup> —W6—O16             | 151.9 (3) | W4—O13—W6                 | 125.6 (3)   |
| O17—W6—O13                          | 96.6 (3)  | W4—O13—W5                 | 137.9 (3)   |
| O18—W6—O13                          | 159.8 (3) | W6—O13—W5                 | 95.1 (2)    |
| O3 <sup>i</sup> —W6—O13             | 84.3 (2)  | W4—O14—W1 <sup>i</sup>    | 136.7 (3)   |
| O16—W6—O13                          | 74.5 (2)  | W6—O16—W5                 | 116.5 (3)   |
| O17—W6—O1 <sup>i</sup>              | 170.9 (3) | W6—O18—Mn2 <sup>v</sup>   | 135.8 (4)   |
| O18—W6—O1 <sup>i</sup>              | 84.3 (3)  | W2 <sup>i</sup> —O19—W5   | 137.3 (3)   |
| O3 <sup>i</sup> —W6—O1 <sup>i</sup> | 72.9 (2)  | W5—O20—Mn3                | 164.3 (4)   |



**Table S3.** BVS sums calculated for the Mn1-Mn3 atoms (for Mn3 bond lengths for the higher-occupancy disorder component are taken).

|                         | <b>Mn1</b> | <b>Mn2</b> | <b>Mn3</b> |
|-------------------------|------------|------------|------------|
| <i>Mn<sup>II</sup></i>  | 2.03       | 2.03       | 2.06       |
| <i>Mn<sup>III</sup></i> | 1.92       | 1.93       | 1.98       |
| <i>Mn<sup>IV</sup></i>  | 1.95       | 1.95       | 1.98       |

**Table S4.** Parameters of hydrogen bonding involving the located H atoms [ $\text{\AA}$ ,  $^\circ$ ] for **1**.  
Symmetry codes: (i)  $-x, -y+1, -z+1$ ; (ii)  $-x, -y+2, -z$ ; (iii)  $-x+1, -y+1, -z+1$ .

| $D-H\cdots A$                         | $D-H$ | $H\cdots A$ | $D\cdots A$ | $D-H\cdots A$ |
|---------------------------------------|-------|-------------|-------------|---------------|
| O6—H6 $\cdots$ O19                    | 0.82  | 2.25        | 2.875 (9)   | 134           |
| O6—H6 $\cdots$ O14 <sup>i</sup>       | 0.82  | 2.24        | 2.859 (9)   | 132           |
| O6—H6 $\cdots$ O6 <sup>i</sup>        | 0.82  | 2.30        | 2.897 (12)  | 130           |
| O1W—H1W1 $\cdots$ O19                 | 0.82  | 2.22        | 3.030 (11)  | 170           |
| O1W—H2W1 $\cdots$ O3W <sup>i</sup>    | 0.82  | 2.25        | 2.888 (13)  | 135           |
| O2W—H2W2 $\cdots$ O9W                 | 0.82  | 2.05        | 2.517 (17)  | 116           |
| O2W—H2W2 $\cdots$ O9W <sup>ii</sup>   | 0.82  | 2.50        | 2.934 (18)  | 114           |
| O2W—H2W2 $\cdots$ O10W                | 0.82  | 2.55        | 2.936 (19)  | 111           |
| O3W—H1W3 $\cdots$ O77W <sup>iii</sup> | 0.82  | 2.33        | 2.95 (2)    | 134           |

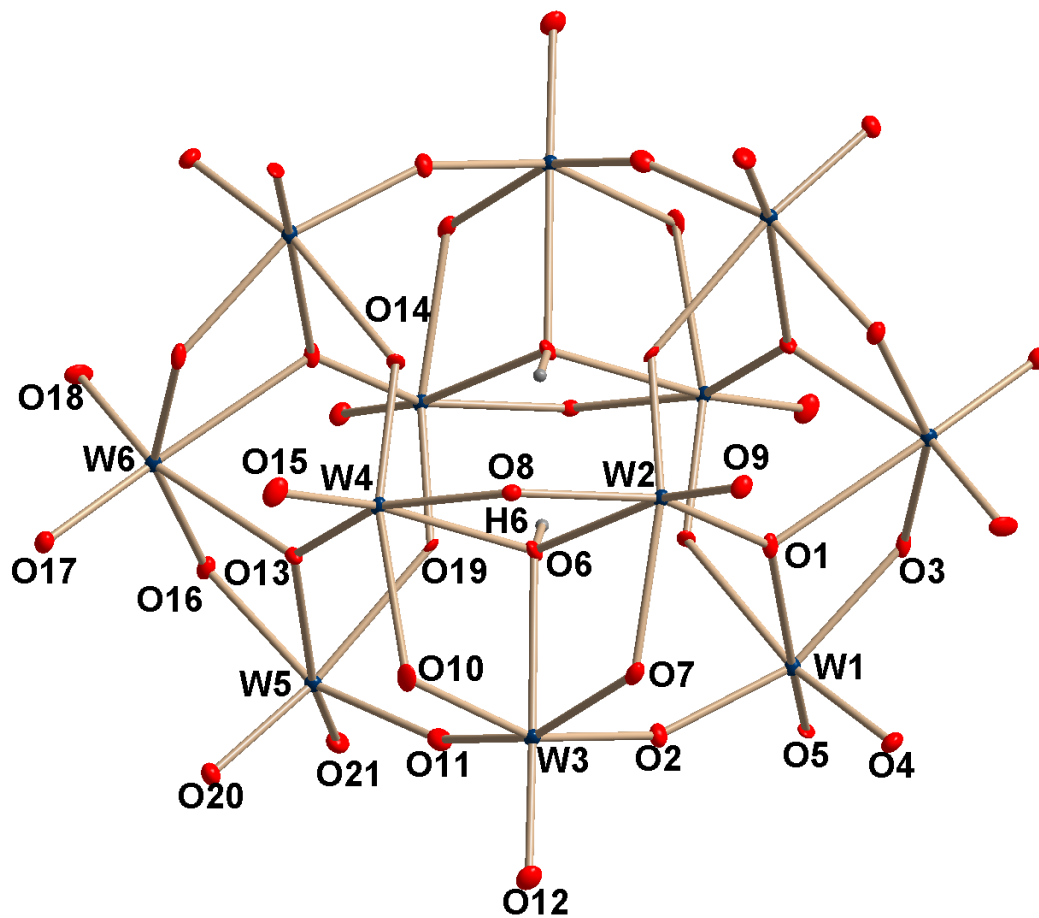

Fig. S12 Structure of the complex anion with atom labeling scheme of the symmetry-independent part. Thermal ellipsoids are plotted at 30% probability level.

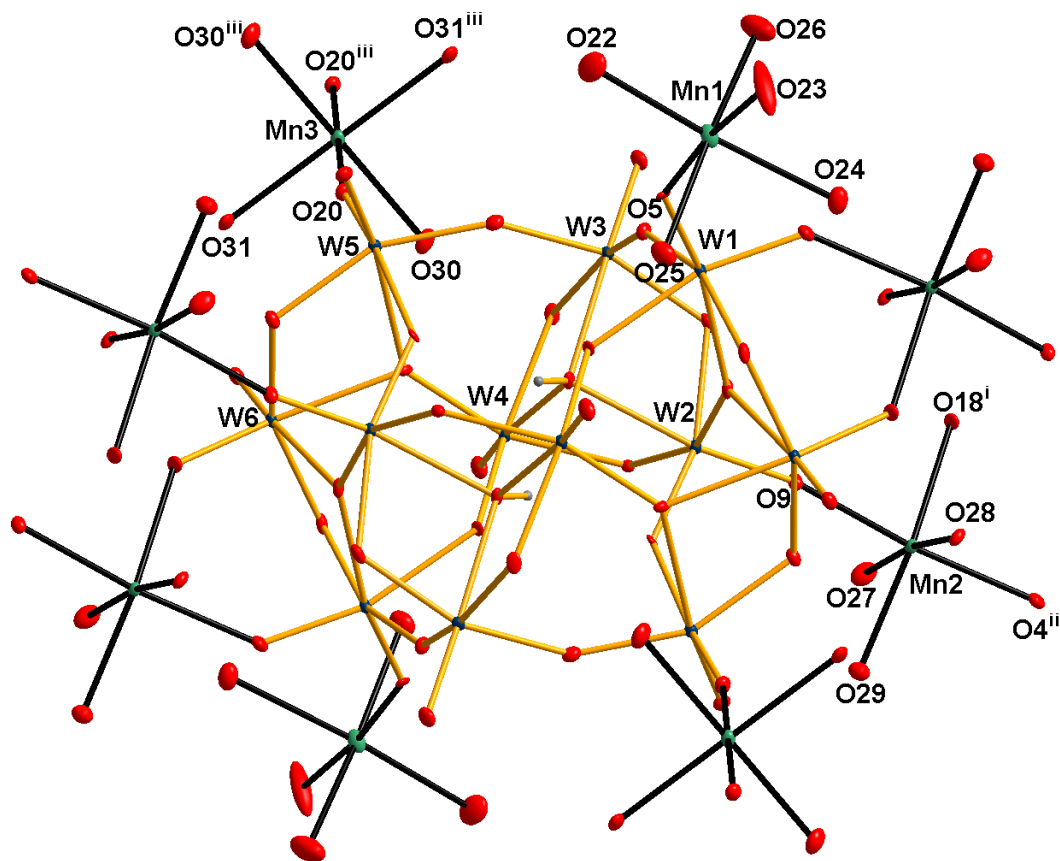

Fig. S13 Coordination of the  $\text{Mn}^{2+}$  ions to the complex anion with Mn-O bonds denoted with black lines and atom labeling scheme. Symmetry codes: [i]  $x, 1+y, z$ ; [ii]  $-x, 2-y, 1-z$ ; [iii]  $1-x, 1-y, -z$ . Thermal ellipsoids are plotted at 30% probability level.

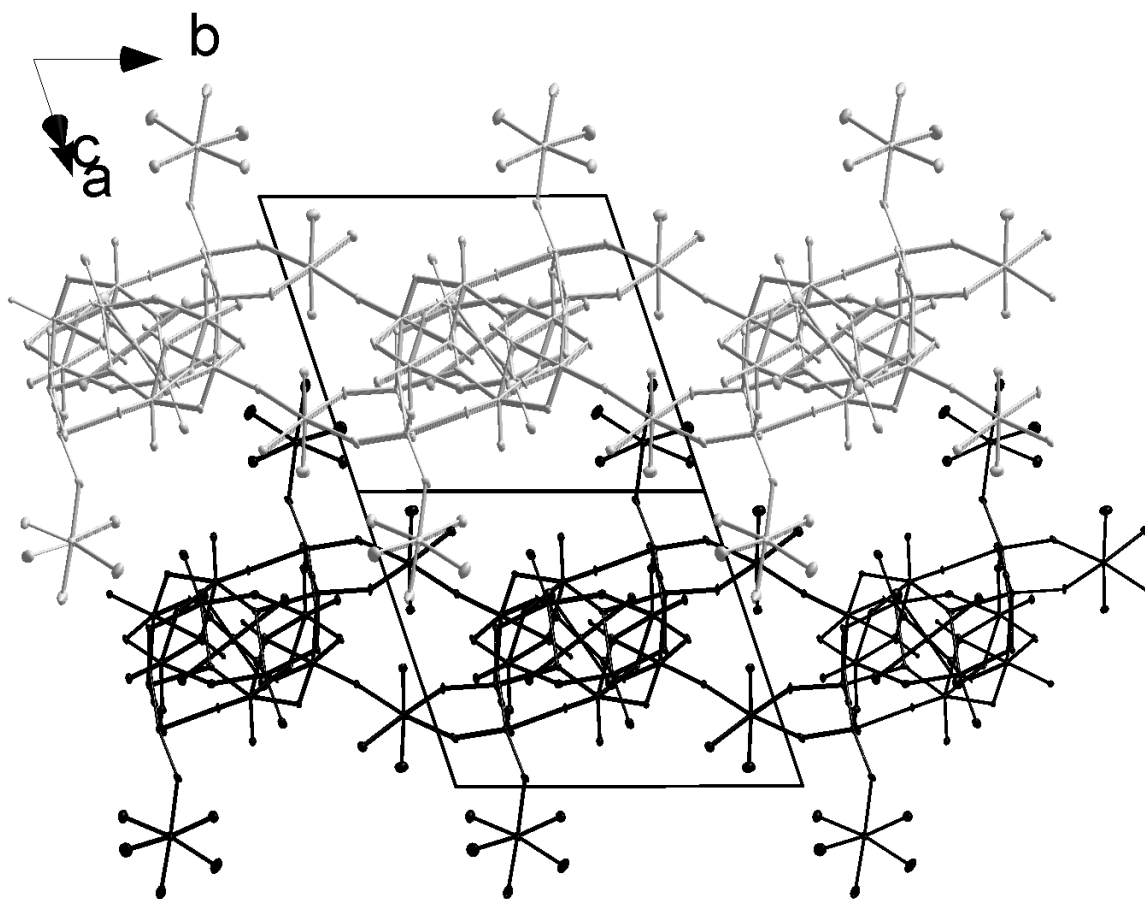

Fig. S14 Two-dimensional polymeric layers in **1** denoted with different colours. Water molecules of solvation are omitted for clarity.

## EDX analysis

Energy dispersive X-ray (EDX) spectroscopy was performed for crystalline samples, using a CamScan 4DV device with EDX Noran Instruments Voyager 4.0 (Pioneer Detector with ultrathin window).

|                           | k-ratio (calc.) | ZAF   | Atom % | Element Wt % | Wt % Err (1-Sigma) |
|---------------------------|-----------------|-------|--------|--------------|--------------------|
| <b>I:</b> chi sqd. = 1.77 |                 |       |        |              |                    |
| Mn-K                      | 0.1272          | 0.983 | 32.35  | 12.50        | ± 0.49             |
| W-L                       | 0.8390          | 1.043 | 67.65  | 87.50        | ± 2.24             |

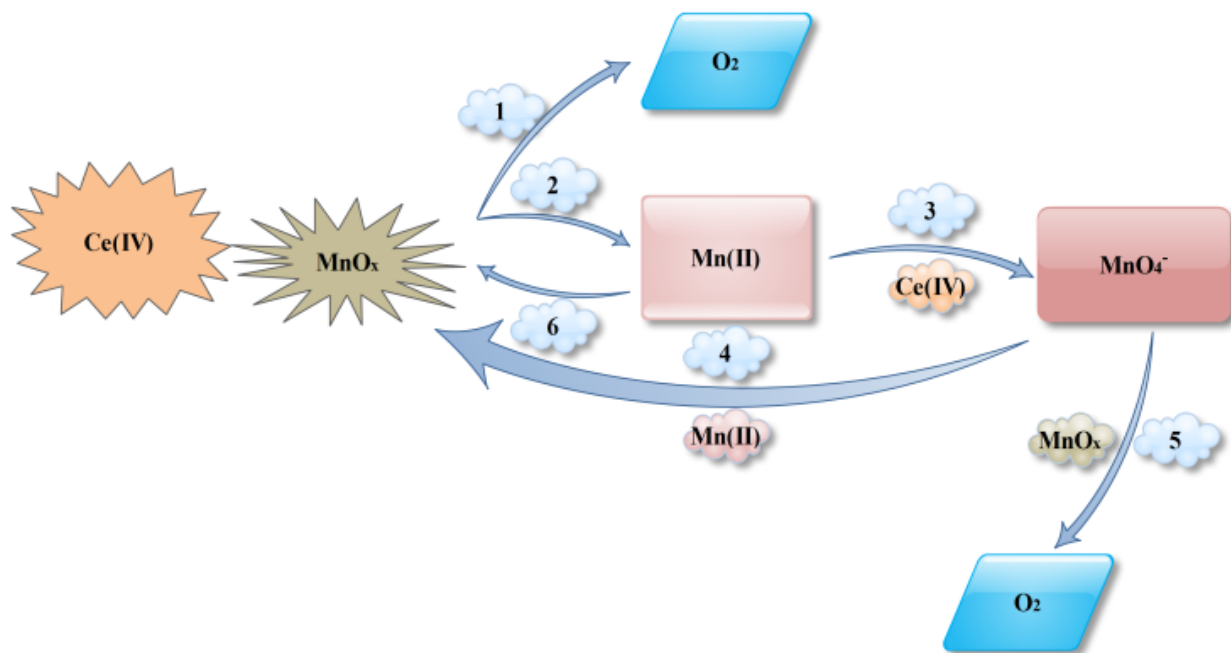

Scheme S1 Proposed mechanisms for the self-healing process in water oxidation catalyzed by Mn oxides in the presence of Ce(IV) 1: Oxygen evolution was detected by an oxygen meter. The origin of oxygen is water. 2: Mn<sup>2+</sup> ions were detected by EPR (see text). 3: The MnO<sub>4</sub><sup>-</sup> ions formation could be detected by UV-Vis in a reaction between Mn<sup>2+</sup> and Ce(IV). 4: It is known that in the reaction of the Mn<sup>2+</sup> ions and MnO<sub>4</sub><sup>-</sup> in different pH values, Mn oxide is produced. 5: MnO<sub>4</sub><sup>-</sup> in the presence of Mn oxide oxidize water. In this reaction, MnO<sub>4</sub><sup>-</sup> ions are reduced to Mn oxide. 6: Mn<sup>2+</sup> in the presence of Ce(IV) forms Mn oxide. In a typical experiment, the reaction of MnSO<sub>4</sub> in the presence of Ce(IV) (1.0 M), results in the MnO<sub>2</sub> product detected by XRD. Image and caption are taken from ref. S4 with modifications.



## References

- [S1] Y. Umena, K. Kawakami, J. R. Shen and N. Kamiya, *Nature*, 2011, **473**, 55.
- [S2] K. J. Klabunde, J. Stark, O. Koper, C. Mohs, D. G. Park, S. Decker, Y. Jiang, I. Lagadic and D. Zhang, *J. Phys. Chem.*, 1996, **100**, 12142.
- [S3] G. M. Sheldrick, SHELXTL 5.1, Bruker AXS Inc., 6300 Enterprise Lane, Madison, WI 53719-1173, USA, 1997.
- [S4] M. M. Najafpour, M. Kompany-Zareh, A. Zahraei, D. Jafarian Sedigh, H. Jaccard, M. Khoshkam, R. D. Britt and W. Casey, 2013, **42**, 14603.
